# Supplementary material for: Developing a taxonomy of care coordination for people living with rare conditions: A qualitative study
Source: bioRxiv or medRxiv preprint supplement (doi:10.1101/2021.11.16.21266387), 2021-11-16
Supplement: Supplementary file [file media-2.pdf]

**CONCORD WORKSHOP HEALTHCARE PROFESSIONALS  
CHARITY REPS & COMMISSIONERS: FEEDBACK ON CO-ORDINATING CARE FOR RARE CONDITIONS**

**① WAYS OF ORGANISING CARE**

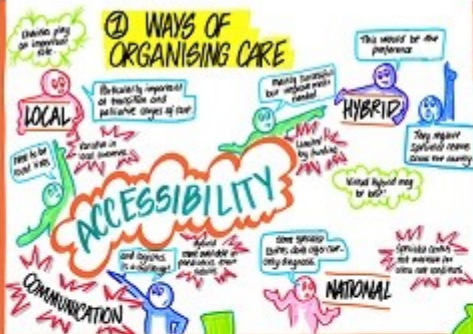

**② WAYS OF ORGANISING TEAMS**

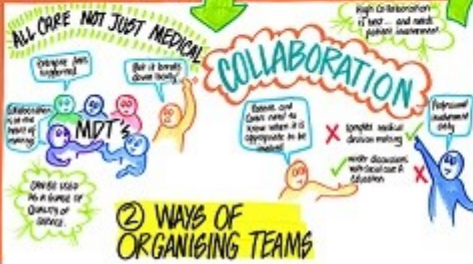

**③ RESPONSIBILITIES**

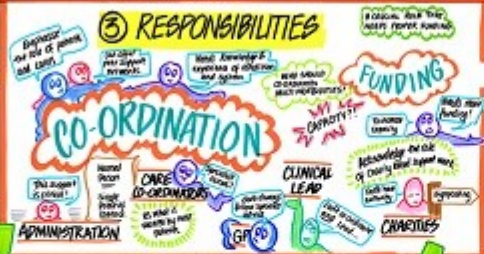

**④ HOW OFTEN**

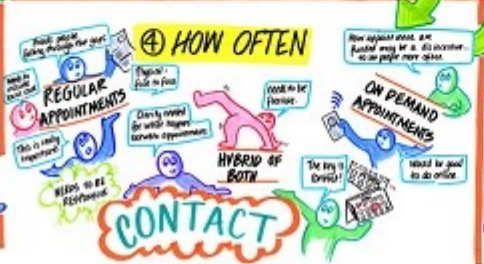

**⑤ ACCESS TO RECORDS**

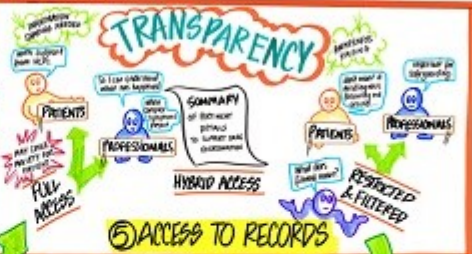

**⑥ COMMUNICATION**

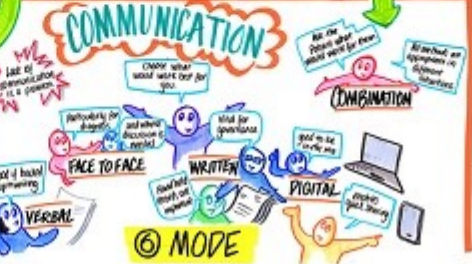

**⑦ MODE**

- IMPACT OF COVID**
- ▲ SHIFT TO DIGITAL / PHONE
  - ▲ CHANGE TO SERVICE DELIVERY
  - ▲ LEADERSHIP FROM NATIONAL SERVICES
  - ▲ INCREASED OPPORTUNITIES FOR COLLABORATION
  - ▲ REDUCED ACCESS TO SPECIALISTS
  - ▲ IMPACT ON CAPACITY
  - ▲ LACK OF CARE / INFORMATION
  - ▲ MORE OPPORTUNITY FOR ON DEMAND APPOINTMENTS
  - ▲ MORE OPPORTUNITY FOR FLEXIBLE MODES OF COMMUNICATION
